# Supplementary material for: Effects of Essential Oil Fumigation on Potato Sprouting at Room-Temperature Storage
Source: MDPI journal article supplement (doi:10.3390/plants11223109), 2022-11-15
Supplement: s1 [file s1]

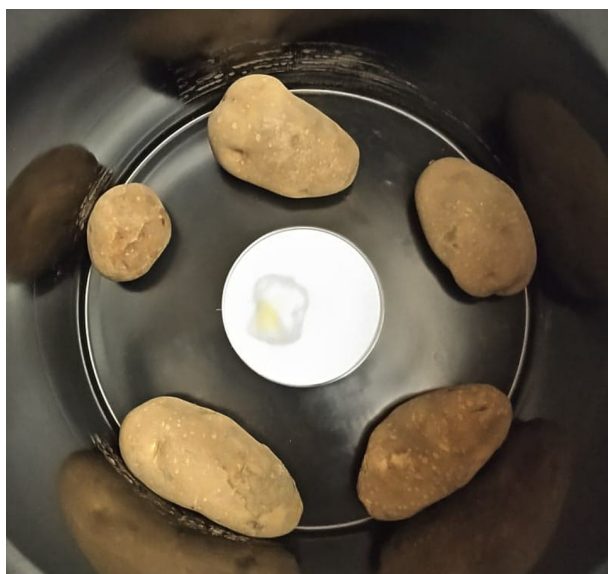

(a)

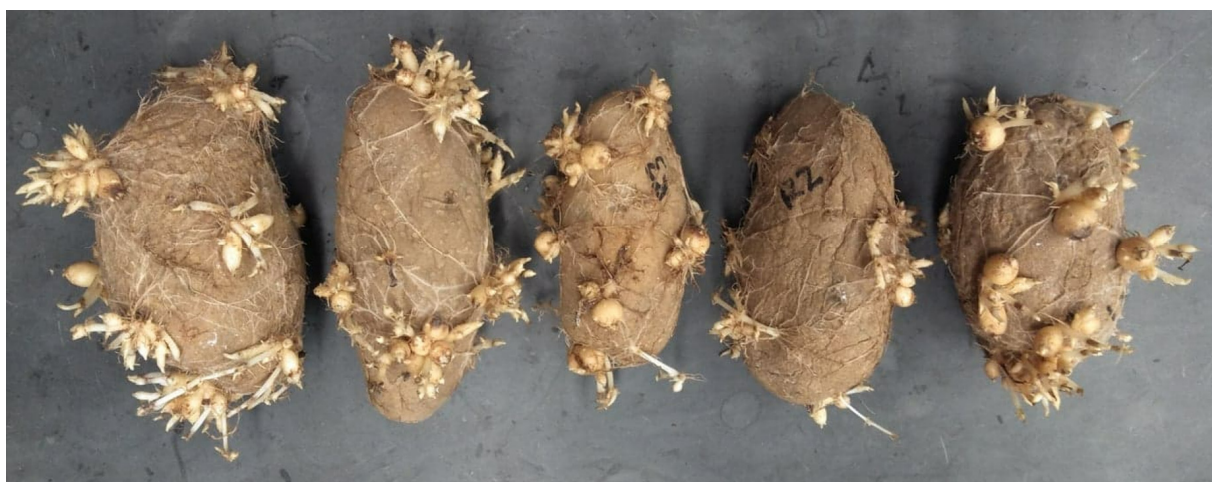

(b)

**Supplementary Figure S1.** Potato tubers treated with **(a)** *A. herba-alba* EO and **(b)** distilled water at 60 days of storage.
